# Supplementary material
Source: MDPI journal article supplement (https://www.mdpi.com/2072-4292/10/3/447)
Supplement: s1 [file s1]

Supplementary

Supplementary Table 1. Summary of producer's and user's accuracies (%) of classifications for site A.

| (a) RF (Scheme 6)  |                     |                 |
|--------------------|---------------------|-----------------|
|                    | Producer's Accuracy | User's Accuracy |
| Built up           | 100.00              | 91.67           |
| Rice paddy         | 100.00              | 100.00          |
| Field              | 87.74               | 96.88           |
| Vegetation         | 93.94               | 86.11           |
| Bara soil          | -                   | 0.00            |
| Water              | 100.00              | 100.00          |
| (b) SVM (Scheme 6) |                     |                 |
|                    | Producer's Accuracy | User's Accuracy |
| Built up           | 85.71               | 100.00          |
| Rice paddy         | 100.00              | 100.00          |
| Field              | 90.38               | 97.92           |
| Vegetation         | 95.38               | 86.11           |
| Bara soil          | -                   | 0.00            |
| Water              | 100.00              | 100.00          |

Supplementary Table 2. Summary of producer's and user's accuracies (%) of classifications for site B.

| (a) RF (Scheme 6)  |                     |                 |
|--------------------|---------------------|-----------------|
|                    | Producer's Accuracy | User's Accuracy |
| Built up           | 74.29               | 83.87           |
| Rice paddy         | 93.62               | 100.00          |
| Field              | 84.62               | 92.96           |
| Forest             | 91.94               | 98.28           |
| Grass              | 60.00               | 27.27           |
| Wetland            | 100.00              | 45.45           |
| Bara soil          | 66.67               | 15.38           |
| Water              | 94.44               | 100.00          |
| (b) SVM (Scheme 2) |                     |                 |
|                    | Producer's Accuracy | User's Accuracy |
| Built up           | 78.13               | 80.65           |
| Rice paddy         | 97.78               | 100.00          |
| Field              | 84.21               | 90.14           |
| Forest             | 93.44               | 98.28           |

|           |        |        |
|-----------|--------|--------|
| Grass     | 44.44  | 36.36  |
| Wetland   | 81.82  | 81.82  |
| Bara soil | 100.00 | 15.38  |
| Water     | 89.47  | 100.00 |

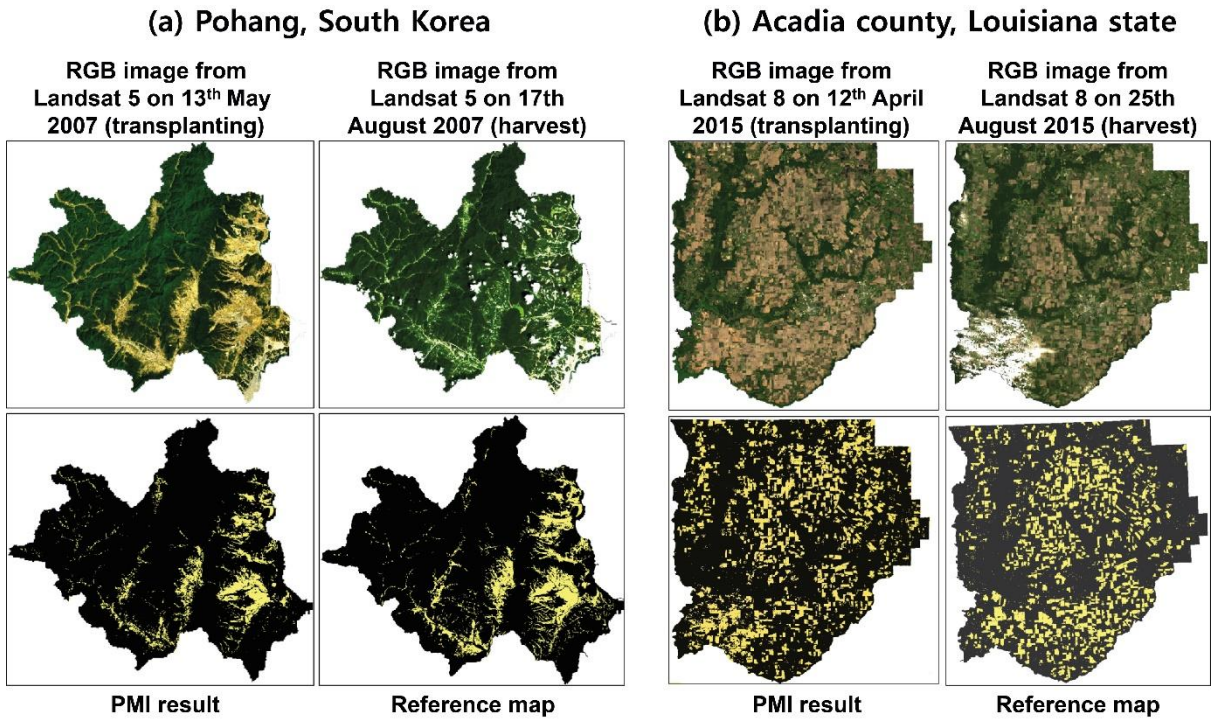

Supplementary Figure 1. Spatial distribution of paddy rice maps at Pohang in South Korea and Acadia County in Louisiana State, United States based on the Google Earth Engine.
